# Supplementary material for: Preconception and Early-Pregnancy Body Mass Index in Women and Men, Time to Pregnancy, and Risk of Miscarriage
Source: PubMed Central journal article supplement (PMC11413718; doi:10.1001/jamanetworkopen.2024.36157), 2024-09-19
Supplement: jamanetwopen-e2436157-s001.pdf [file jamanetwopen-e2436157-s001.pdf]

## Supplementary Online Content

Boxem AJ, Blaauwendraad SM, Mulders AGMGJ, et al. Preconception and early-pregnancy body mass index in women and men, time to pregnancy, and risk of miscarriage. *JAMA Netw Open*. 2024;7(9):e2436157. doi:10.1001/jamanetworkopen.2024.36157

### eMethods.

**eFigure 1.** Flowchart of Participants Included in the Study

**eFigure 2.** Directed Acyclic Graph of Body Mass Index and Time to Pregnancy

**eFigure 3.** Directed Acyclic Graph of Body Mass Index and the Odds of Miscarriage

**eTable 1.** Non-Response Analysis of Participants Included and Excluded From the Study Population

**eTable 2.** Non-Response Analysis of Episodes Included and Excluded from the Study Population

**eTable 3.** Associations of Body Mass Index in Women and Men With Fecundability Ratios, Basic Model

**eTable 4.** Associations of Body Mass Index in Women and Men With Fecundability Ratios, Adjusted Model

**eTable 5.** Associations of Body Mass Index in Women and Men With Fecundability Ratios, Adjusted Model Excluding Top 5% of Time to Pregnancy

**eTable 6.** Associations of Body Mass Index in Women and Men With Fecundability Ratios, Adjusted Model Including Only First Episodes

**eTable 7.** Associations of Body Mass Index in Women and Men With Fecundability Ratios, Adjusted Model Including Body Mass Index of Partner

**eTable 8.** Associations of Joint Body Mass Index of Women and Men With Fecundability Ratios, Adjusted Model

**eTable 9.** Associations of Body Mass Index in Women and Men With Odds of Subfertility, Basic Model

**eTable 10.** Associations of Body Mass Index in Women and Men With Odds of Subfertility, Adjusted Model

**eTable 11.** Associations of Body Mass Index in Women and Men With Odds of Subfertility, Adjusted Model Excluding Couples Undergoing Assisted Reproductive Technology

**eTable 12.** Associations of Body Mass Index in Women and Men With Odds of Subfertility, Adjusted Model Excluding Top 5% of Time to Pregnancy

**eTable 13.** Associations of Body Mass Index in Women and Men With Odds of Subfertility, Adjusted Model Including Only First Episodes

**eTable 14.** Associations of Body Mass Index in Women and Men With Odds of Subfertility, Adjusted Model Including Body Mass Index of Partner

**eTable 15.** Associations of Joint Body Mass Index of Women and Men With Odds of Subfertility, Adjusted Model

**eTable 16.** Associations of Body Mass Index in Women and Men With Hazard Ratios of Miscarriage, Basic Model

**eTable 17.** Associations of Body Mass Index in Women and Men With Hazard Ratios of Miscarriage, Adjusted Model

**eTable 18.** Associations of Body Mass Index in Women and Men With Hazard Ratios of Miscarriage, Adjusted Model Excluding Couples Undergoing Assisted Reproductive Technology

**eTable 19.** Associations of Body Mass Index in Women and Men With Hazard Ratios of Miscarriage, Adjusted Model Including Only First Episodes

**eTable 20.** Associations of Body Mass Index in Women and Men With Hazard Ratios of Miscarriage, Adjusted Model Including Body Mass Index of Partner

**eTable 21.** Associations of Joint Body Mass Index of Women and Men With Hazard Ratios of Miscarriage, Adjusted Model

**eTable 22.** Associations of Body Mass Index in Women and Men With Odds of Miscarriage, Basic Model

**eTable 23.** Associations of Body Mass Index in Women and Men With Odds of Miscarriage, Adjusted Model

**eTable 24.** Associations of Body Mass Index in Women and Men With Odds of Miscarriage, Adjusted Model Excluding Couples Undergoing Assisted Reproductive Technology

**eTable 25.** Associations of Body Mass Index in Women and Men With Odds of Miscarriage, Adjusted Model Including Only First Episodes

**eTable 26.** Associations of Body Mass Index in Women and Men With Odds of Miscarriage, Adjusted Model Including Body Mass Index of Partner

**eTable 27.** Associations of Joint Body Mass Index of Women and Men With Odds of Miscarriage, Adjusted Model

This supplementary material has been provided by the authors to give readers additional information about their work.

## eMethods

### Calculation of Fecundability Ratio on the continuous and categorical scale

The Hazard Ratio (HR) of body mass index (BMI) was calculated by dividing the hazard rate of conceiving within one month with one unit increase or decrease in BMI by the hazard rate of the mean BMI:

$$HR = (H(t) \pm 1 \text{ unit BMI}) / (H(t) \text{ mean BMI}),$$

or, dividing the hazard rate of conceiving within one month of the different categories of BMI by the hazard rate of the reference category of BMI:

$$HR = (H(t) \pm \text{BMI category}) / (H(t) \text{ BMI reference category}).$$

A  $HR < 1$  indicates a lower fecundability per unit increase or decrease in BMI or as compared to the reference category of BMI.

**eFigure 1.** Flowchart of Participants Included in the Study

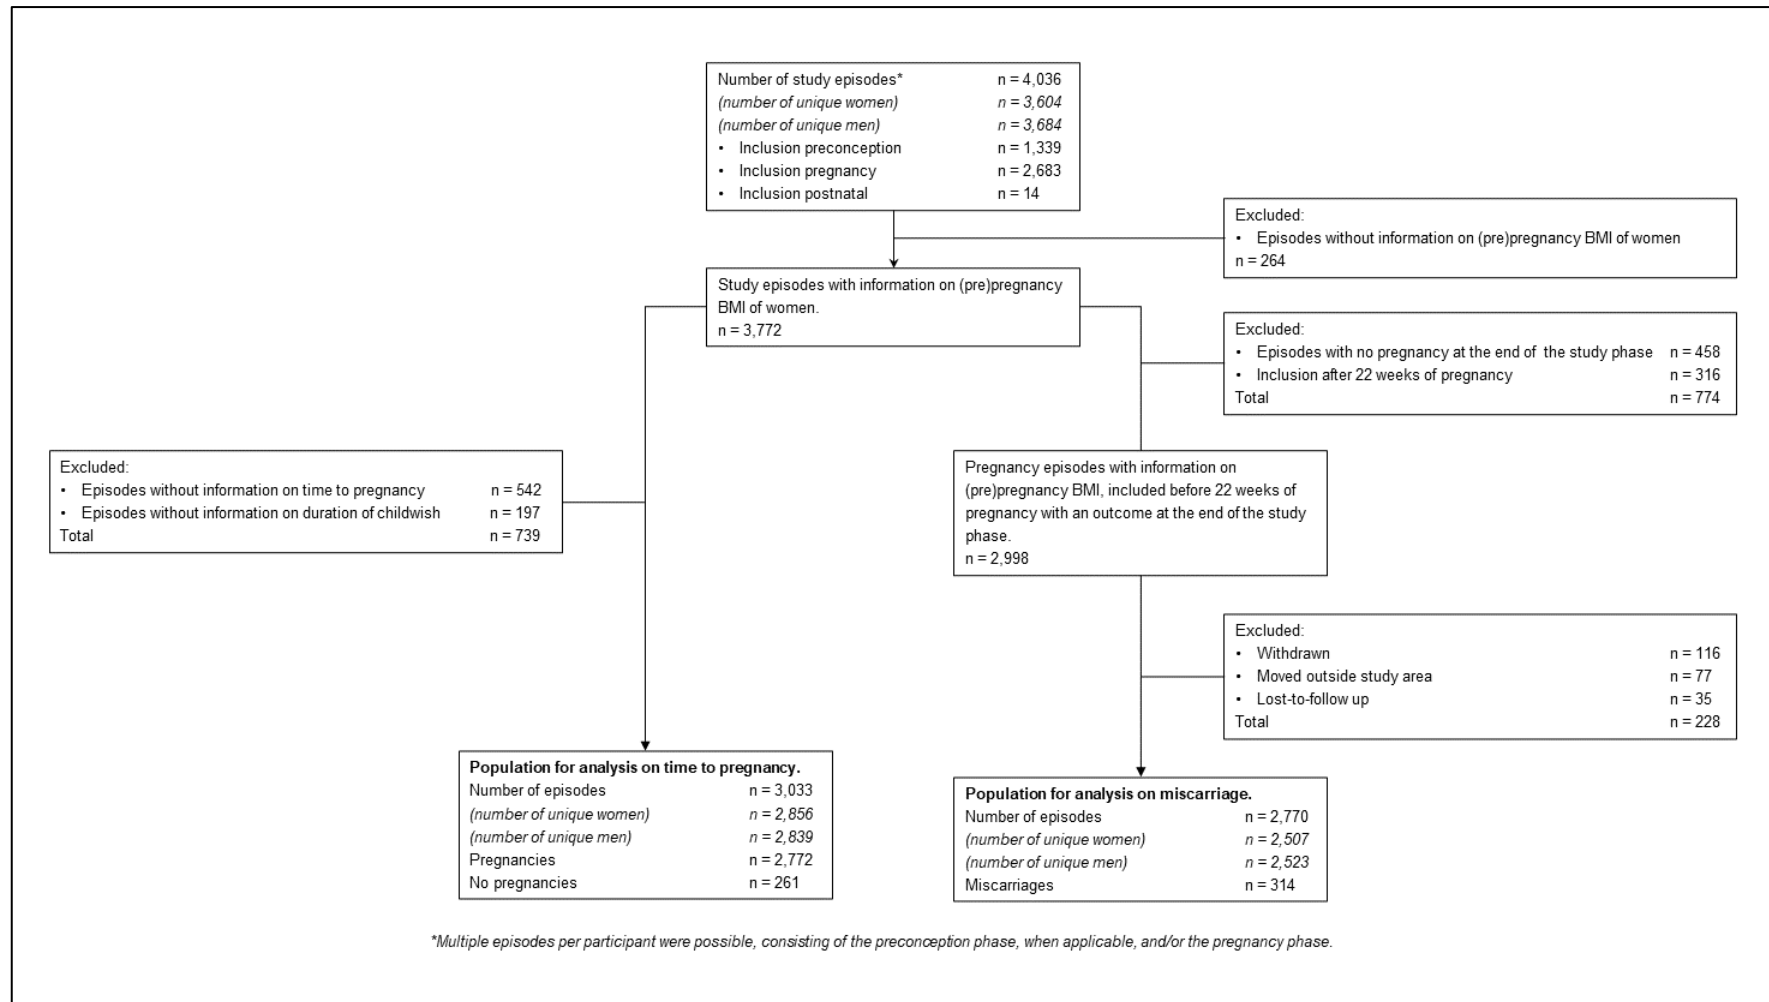

**eFigure 2.** Directed Acyclic Graph of Body Mass Index and Time to Pregnancy

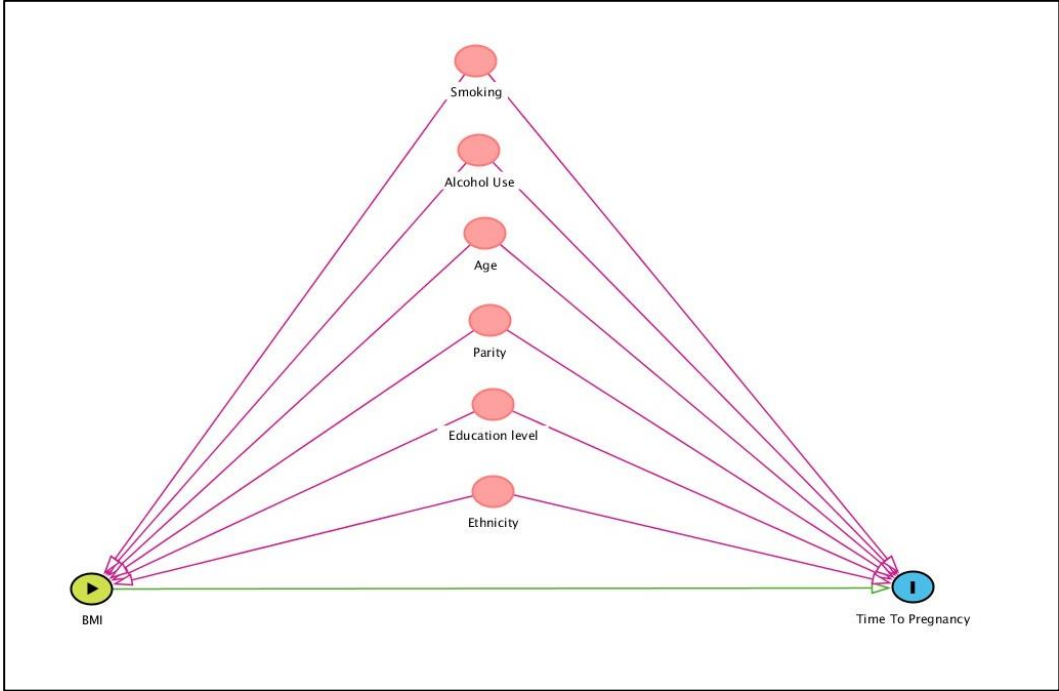

**eFigure 3.** Directed Acyclic Graph of Body Mass Index and the Odds of Miscarriage

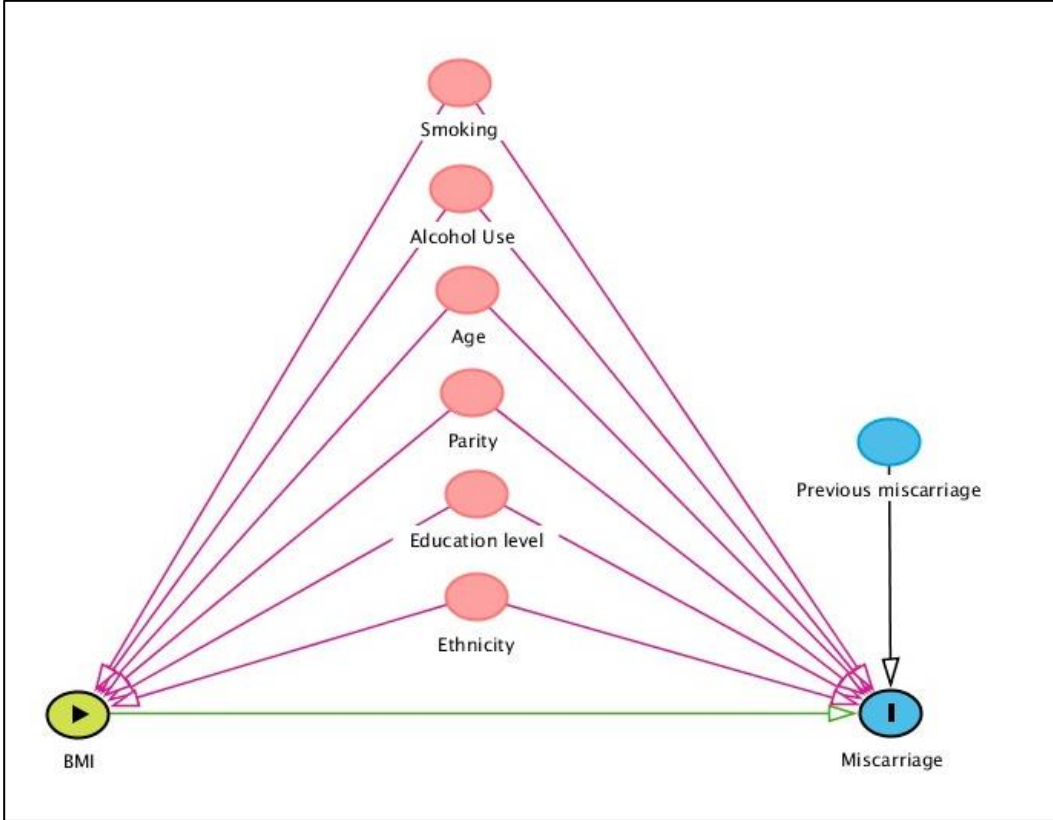

**eTable 1.** Non-Response Analysis of Participants Included and Excluded From the Study Population

|                                             | Women                              |                                      |         | Men                                |                                     |         |
|---------------------------------------------|------------------------------------|--------------------------------------|---------|------------------------------------|-------------------------------------|---------|
|                                             | Participants, No. %                |                                      |         | Participants, No. %                |                                     |         |
|                                             | Responders<br>N=3,160 <sup>a</sup> | Non-responders<br>N=238 <sup>b</sup> | p-value | Responders<br>N=2,272 <sup>a</sup> | Non-responders<br>N=39 <sup>b</sup> | p-value |
| Age at enrolment, median (IQR), y           | 31.3 (28.8-34.3)                   | 30.0 (27.1-33.6)                     | <0.01   | 33.3 (30.3-36.6)                   | 29.9 (26.5-34.7)                    | <0.01   |
| <30 y                                       | 1126 (35.6)                        | 118 (49.6)                           |         | 530 (23.3)                         | 21 (53.8)                           |         |
| 30-35 y                                     | 1369 (43.3)                        | 77 (32.4)                            |         | 933 (41.1)                         | 9 (23.1)                            |         |
| >35 y                                       | 665 (21.0)                         | 43 (18.1)                            |         | 807 (35.6)                         | 9 (23.1)                            |         |
| Missing                                     | 0 (0.0)                            | 0 (0.0)                              |         | 2 (0.1)                            | 0 (0.0)                             |         |
| Ethnicity                                   |                                    |                                      | <0.01   |                                    |                                     | 0.12    |
| Dutch                                       | 1775 (60.0)                        | 64 (48.5)                            |         | 1409 (65.3)                        | 8 (47.1)                            |         |
| Other non-Western <sup>c</sup>              | 275 (9.3)                          | 21 (15.9)                            |         | 201 (9.3)                          | 1 (5.9)                             |         |
| Other Western <sup>d</sup>                  | 906 (30.6)                         | 47 (35.6)                            |         | 548 (25.4)                         | 8 (47.1)                            |         |
| Missing                                     | 204 (6.5)                          | 106 (44.5)                           |         | 114 (5.0)                          | 22 (56.4)                           |         |
| Educational level                           |                                    |                                      | 0.85    |                                    |                                     | 0.07    |
| No, primary or secondary education finished | 889 (30.3)                         | 38 (29.2)                            |         | 777 (36.0)                         | 10 (58.8)                           |         |
| Higher education finished                   | 2046 (69.7)                        | 92 (70.8)                            |         | 1382 (64.0)                        | 7 (41.2)                            |         |
| Missing                                     | 225 (7.1)                          | 108 (45.4)                           |         | 113 (5.0)                          | 22 (56.4)                           |         |
| BMI, median (IQR)                           | 23.6 (21.3-26.9)                   | 24.1 (21.8-28.4)                     | 0.02    | 25.0 (23.0-27.5)                   | 26.8 (23.4-28.9)                    | 0.08    |
| Underweight (<18.5)                         | 96 (3.0)                           | 4 (1.7)                              |         | 19 (0.8)                           | 0 (0.0)                             |         |
| Normal weight (18.5-24.9)                   | 1879 (59.5)                        | 128 (53.8)                           |         | 1124 (49.5)                        | 14 (35.9)                           |         |
| Overweight (25-29.9)                        | 752 (23.8)                         | 57 (23.9)                            |         | 862 (37.9)                         | 19 (48.7)                           |         |
| Obesity (≥30)                               | 433 (13.7)                         | 49 (20.6)                            |         | 267 (11.8)                         | 6 (15.4)                            |         |
| Missing                                     | 0 (0.0)                            | 0 (0.0)                              |         | 0 (0.0)                            | 0 (0.0)                             |         |
| Smoking                                     |                                    |                                      | 0.02    |                                    |                                     | 0.55    |
| No                                          | 1580 (55.3)                        | 65 (55.6)                            |         | 1060 (50.2)                        | 7 (50.0)                            |         |
| Quit smoking before pregnancy               | 875 (30.6)                         | 45 (38.5)                            |         | 660 (31.3)                         | 3 (21.4)                            |         |
| Smoked during pregnancy                     | 400 (14.0)                         | 7 (6.0)                              |         | 390 (18.5)                         | 4 (28.6)                            |         |
| Missing                                     | 305 (9.7)                          | 121 (50.8)                           |         | 162 (7.1)                          | 25 (64.1)                           |         |

|                                                         | Women                              |                                      |                 | Men                                |                                     |             |
|---------------------------------------------------------|------------------------------------|--------------------------------------|-----------------|------------------------------------|-------------------------------------|-------------|
|                                                         | Participants, No. %                |                                      |                 | Participants, No. %                |                                     |             |
|                                                         | Responders<br>N=3,160 <sup>a</sup> | Non-responders<br>N=238 <sup>b</sup> | p-value         | Responders<br>N=2,272 <sup>a</sup> | Non-responders<br>N=39 <sup>b</sup> | p-value     |
| Alcohol consumption                                     |                                    |                                      | <i>&lt;0.01</i> |                                    |                                     | <i>0.19</i> |
| No consumption < 3 mo before pregnancy                  | 638 (22.3)                         | 21 (18.3)                            |                 | 255 (12.1)                         | 4 (26.7)                            |             |
| Consumption < 3 mo before pregnancy                     | 1803 (63.1)                        | 88 (76.5)                            |                 | 1850 (87.9)                        | 11 (73.3)                           |             |
| Consumption during pregnancy                            | 418 (14.6)                         | 6 (5.2)                              |                 | NA                                 | NA                                  |             |
| Missing                                                 | 301 (9.5)                          | 123 (51.7)                           |                 | 176 (7.4)                          | 24 (61.5)                           |             |
| Parity                                                  |                                    |                                      | <i>&lt;0.01</i> |                                    |                                     | <i>1.00</i> |
| Nulliparous                                             | 1933 (67.8)                        | 98 (83.1)                            |                 | 1479 (69.7) <sup>f</sup>           | 8 (72.7) <sup>f</sup>               |             |
| Multiparous                                             | 918 (32.2)                         | 20 (16.9)                            |                 | 643 (30.3) <sup>f</sup>            | 3 (27.3) <sup>f</sup>               |             |
| Missing                                                 | 309 (9.8)                          | 120 (50.4)                           |                 | 150 (6.6) <sup>f</sup>             | 28 (71.8) <sup>f</sup>              |             |
| Miscarriage in previous pregnancy                       |                                    |                                      | <i>0.04</i>     |                                    |                                     | <i>0.64</i> |
| No                                                      | 2293 (80.9)                        | 105 (89.0)                           |                 | 1740 (82.3) <sup>f</sup>           | 11 (91.7) <sup>f</sup>              |             |
| Yes                                                     | 543 (19.1)                         | 13 (11.0)                            |                 | 375 (17.7) <sup>f</sup>            | 1 (8.3) <sup>f</sup>                |             |
| Missing                                                 | 324 (10.3)                         | 120 (50.4)                           |                 | 157 (6.9) <sup>f</sup>             | 28 (71.8) <sup>f</sup>              |             |
| Time to pregnancy, median (95% range), mo. <sup>e</sup> | 3.4 (0.0-67.9)                     | NA                                   | <i>NA</i>       | 3.0 (0.0-58.7) <sup>f</sup>        | NA <sup>f</sup>                     | <i>NA</i>   |
| 0-12 mo                                                 | 1825 (65.2)                        | 0                                    |                 | 1582 (75.9) <sup>f</sup>           | 0 <sup>f</sup>                      |             |
| > 12 mo                                                 | 463 (16.5)                         | 0                                    |                 | 311 (14.9) <sup>f</sup>            | 0 <sup>f</sup>                      |             |
| ART leading to pregnancy                                | 264 (9.4)                          | 0                                    |                 | 192 (9.2) <sup>f</sup>             | 0 <sup>f</sup>                      |             |
| Not pregnant                                            | 249 (8.9)                          | 155 (100.0)                          |                 | 0 <sup>f</sup>                     | 0 <sup>f</sup>                      |             |
| Missing                                                 | 359 (11.4)                         | 83 (34.9)                            |                 | 187 (8.2) <sup>f</sup>             | 39 (100.0) <sup>f</sup>             |             |
| Occurrence of miscarriage                               |                                    |                                      | <i>NA</i>       |                                    |                                     | <i>NA</i>   |
| Miscarriage                                             | 280 (9.6)                          | 0                                    |                 | 151 (6.6) <sup>f</sup>             | 0 <sup>f</sup>                      |             |
| No miscarriage                                          | 2631 (90.4)                        | 83 (100.0)                           |                 | 2121 (93.4) <sup>f</sup>           | 39 (100.0) <sup>f</sup>             |             |
| Missing                                                 | 249 (7.9)                          | 155 (65.1)                           |                 | 0 <sup>f</sup>                     | 0 <sup>f</sup>                      |             |
| Timing of miscarriage, median (IQR), wk.                | 8.3 (7.1-9.6)                      | NA                                   | <i>NA</i>       | 8.7 (7.9-9.6) <sup>f</sup>         | NA <sup>f</sup>                     | <i>NA</i>   |
| First trimester                                         | 255 (92.7)                         | 0                                    |                 | 138 (92.0) <sup>f</sup>            | 0 <sup>f</sup>                      |             |
| Second trimester                                        | 20 (7.3)                           | 0                                    |                 | 12 (8.0) <sup>f</sup>              | 0 <sup>f</sup>                      |             |
| Missing                                                 | 5 (1.8)                            | 238 (100.0)                          |                 | 1 (0.7) <sup>f</sup>               | 39 (100.0) <sup>f</sup>             |             |

Abbreviations: ART, assisted reproductive technology; BMI, body mass index (calculated as weight in kilograms divided by height in meters squared); NA, not applicable.  
Women were included in preconception and pregnancy between 2017 and 2021. Values are presented as median (IQR), median (95% range) or number of participants (valid %).

<sup>a</sup> Study population of time to pregnancy and miscarriage consisting of 3,160 unique women and 2,272 unique men from Rotterdam.

<sup>b</sup> Non-responders consisted of 238 unique women and 39 unique men.

<sup>c</sup> Included: African; American, non-western; Asian, non-western; Chinese; Indonesian ethnicity.

<sup>d</sup> Included: American, western; Asian, western; Cape Verdean; Dutch Antilles; European; German; Yugoslav; Moroccan; Oceanian; Polish; Surinamese, or Turkish.

<sup>e</sup> Time to pregnancy in months was derived from pregnancy episodes with a natural conception.

<sup>f</sup> Parity, miscarriage in previous pregnancy, time to pregnancy in months, occurrence of miscarriage, timing of miscarriage in weeks in men were derived from their partner.



**eTable 2.** Non-Response Analysis of Episodes Included and Excluded from the Study Population

|                                             | Women                                |                                        |         | Men                                  |                                       |         |
|---------------------------------------------|--------------------------------------|----------------------------------------|---------|--------------------------------------|---------------------------------------|---------|
|                                             | Episodes, No. %                      |                                        |         | Episodes, No. %                      |                                       |         |
|                                             | Responders<br>N = 3,476 <sup>a</sup> | Non-responders<br>N = 296 <sup>b</sup> | p-value | Responders<br>N = 2,513 <sup>a</sup> | Non-responders<br>N = 49 <sup>b</sup> | p-value |
| Age at enrolment, median (IQR), y           | 31.5 (28.9-34.5)                     | 30.6 (27.4-34.1)                       | 0.01    | 33.4 (30.4-36.8)                     | 29.9 (26.4-35.1)                      | <0.01   |
| <30 y                                       | 1193 (34.3)                          | 135 (45.6)                             |         | 565 (22.5)                           | 26 (53.1)                             |         |
| 30-35 y                                     | 1527 (43.9)                          | 101 (34.1)                             |         | 1017 (40.5)                          | 10 (20.4)                             |         |
| >35 y                                       | 756 (21.7)                           | 60 (20.3)                              |         | 929 (37.0)                           | 13 (26.5)                             |         |
| Missing                                     | 0                                    | 0                                      |         | 2 (0.1)                              | 0                                     |         |
| Ethnicity                                   |                                      |                                        | 0.01    |                                      |                                       | 0.03    |
| Dutch                                       | 1987 (60.9)                          | 91 (50.0)                              |         | 1569 (65.5)                          | 12 (48.0)                             |         |
| Other non-Western <sup>c</sup>              | 295 (9.0)                            | 23 (12.6)                              |         | 222 (9.3)                            | 1 (4.0)                               |         |
| Other Western <sup>d</sup>                  | 983 (30.1)                           | 68 (37.4)                              |         | 606 (25.3)                           | 12 (48.0)                             |         |
| Missing                                     | 211 (6.1)                            | 114 (38.5)                             |         | 116 (4.6)                            | 24 (49.0)                             |         |
| Educational level                           |                                      |                                        | 0.93    |                                      |                                       | 0.04    |
| No, primary or secondary education finished | 961 (29.6)                           | 54 (29.8)                              |         | 843 (35.2)                           | 14 (56.0)                             |         |
| Higher education finished                   | 2283 (70.4)                          | 127 (70.2)                             |         | 1555 (64.8)                          | 11 (44.0)                             |         |
| Missing                                     | 232 (6.7)                            | 115 (38.9)                             |         | 115 (4.6)                            | 24 (49.0)                             |         |
| BMI, median (IQR)                           | 23.6 (21.3-26.9)                     | 24.1 (21.6-28.3)                       | 0.01    | 25.0 (23.0-27.5)                     | 26.1 (22.6-28.7)                      | 0.32    |
| Underweight (<18.)                          | 103 (3.0)                            | 6 (2.0)                                |         | 20 (0.8)                             | 1 (2.0)                               |         |
| Normal weight (18.5-24.9)                   | 2067 (59.5)                          | 158 (53.4)                             |         | 1236 (49.2)                          | 20 (40.8)                             |         |
| Overweight (25-29.9)                        | 835 (24.0)                           | 72 (24.3)                              |         | 962 (38.3)                           | 20 (40.8)                             |         |
| Obesity (≥30)                               | 471 (13.6)                           | 60 (20.3)                              |         | 295 (11.7)                           | 8 (16.3)                              |         |
| Missing                                     | 0                                    | 0                                      |         | 0                                    | 0                                     |         |
| Smoking                                     |                                      |                                        | 0.08    |                                      |                                       | 0.46    |
| No                                          | 1612 (54.9)                          | 65 (54.6)                              |         | 1181 (50.9)                          | 7 (41.2)                              |         |
| Quit smoking before pregnancy               | 913 (31.1)                           | 45 (37.8)                              |         | 725 (31.2)                           | 5 (29.4)                              |         |
| Smoked during pregnancy                     | 413 (14.1)                           | 9 (7.6)                                |         | 416 (17.9)                           | 5 (29.4)                              |         |
| Missing                                     | 538 (15.5)                           | 177 (59.8)                             |         | 191 (7.6)                            | 32 (65.3)                             |         |

|                                                         | Women                                |                                        |         | Men                                  |                                       |         |
|---------------------------------------------------------|--------------------------------------|----------------------------------------|---------|--------------------------------------|---------------------------------------|---------|
|                                                         | Episodes, No. %                      |                                        |         | Episodes, No. %                      |                                       |         |
|                                                         | Responders<br>N = 3,476 <sup>a</sup> | Non-responders<br>N = 296 <sup>b</sup> | p-value | Responders<br>N = 2,513 <sup>a</sup> | Non-responders<br>N = 49 <sup>b</sup> | p-value |
| Alcohol consumption                                     |                                      |                                        | <0.01   |                                      |                                       | 0.09    |
| No consumption < 3 mo before pregnancy                  | 686 (22.0)                           | 21 (17.2)                              |         | 276 (11.9)                           | 5 (27.8)                              |         |
| Consumption < 3 mo before pregnancy                     | 1972 (63.3)                          | 93 (76.2)                              |         | 2042 (88.1)                          | 13 (72.2)                             |         |
| Consumption during pregnancy                            | 458 (14.7)                           | 8 (6.6)                                |         | NA                                   | NA                                    |         |
| Missing                                                 | 360 (10.4)                           | 174 (58.8)                             |         | 195 (7.8)                            | 31 (63.3)                             |         |
| Parity                                                  |                                      |                                        | 0.30    |                                      |                                       | 0.07    |
| Nulliparous                                             | 2042 (64.8)                          | 116 (69.0)                             |         | 1567 (66.5) <sup>f</sup>             | 9 (45.0) <sup>f</sup>                 |         |
| Multiparous                                             | 1108 (35.2)                          | 52 (31.0)                              |         | 791 (33.5) <sup>f</sup>              | 11 (55.0) <sup>f</sup>                |         |
| Missing                                                 | 326 (9.4)                            | 128 (43.2)                             |         | 155 (6.2) <sup>f</sup>               | 29 (59.2) <sup>f</sup>                |         |
| Miscarriage in previous pregnancy                       |                                      |                                        | 0.01    |                                      |                                       | 0.56    |
| No                                                      | 2302 (79.3)                          | 105 (89.0)                             |         | 1743 (80.8) <sup>f</sup>             | 11 (91.7) <sup>f</sup>                |         |
| Yes                                                     | 601 (20.7)                           | 13 (11.0)                              |         | 415 (19.2) <sup>f</sup>              | 1 (8.3) <sup>f</sup>                  |         |
| Missing                                                 | 573 (16.5)                           | 178 (60.1)                             |         | 355 (14.1) <sup>f</sup>              | 37 (75.5) <sup>f</sup>                |         |
| Time to pregnancy, median (95% range), mo. <sup>e</sup> | 3.7 (0.0-68.3)                       | NA                                     | NA      | 3.3 (0.0-59.5) <sup>f</sup>          | NA <sup>f</sup>                       | NA      |
| 0-12 mo                                                 | 1944 (63.7)                          | 0                                      |         | 1692 (74.0) <sup>f</sup>             | 0 <sup>f</sup>                        |         |
| > 12 mo                                                 | 541 (17.7)                           | 0                                      |         | 382 (16.7) <sup>f</sup>              | 0 <sup>f</sup>                        |         |
| ART leading to pregnancy                                | 306 (10.0)                           | 0                                      |         | 214 (9.4) <sup>f</sup>               | 0 <sup>f</sup>                        |         |
| Not pregnant                                            | 261 (8.6)                            | 197 (100.0)                            |         | 0 <sup>f</sup>                       | 0 <sup>f</sup>                        |         |
| Missing                                                 | 424 (12.2)                           | 99 (33.4)                              |         | 225 (9.0) <sup>f</sup>               | 49 (100.0) <sup>f</sup>               |         |
| Occurrence of miscarriage                               |                                      |                                        | NA      |                                      |                                       | NA      |
| Miscarriage                                             | 314 (9.8)                            | 0                                      |         | 174 (6.9) <sup>f</sup>               | 0 <sup>f</sup>                        |         |
| No miscarriage                                          | 2901 (90.2)                          | 21 (100.0)                             |         | 2339 (93.1) <sup>f</sup>             | 49 (100.0) <sup>f</sup>               |         |
| Missing                                                 | 261 (7.5)                            | 275 (92.3)                             |         | 0 <sup>f</sup>                       | 0 <sup>f</sup>                        |         |
| Timing of miscarriage, median (IQR), wk.                | 8.3 (0.8-53.8)                       | NA                                     | NA      | 8.6 (7.9-9.6) <sup>f</sup>           | NA <sup>f</sup>                       | NA      |
| First trimester                                         | 284 (90.2)                           | 0                                      |         | 158 (91.9) <sup>f</sup>              | 0 <sup>f</sup>                        |         |
| Second trimester                                        | 24 (7.6)                             | 0                                      |         | 14 (8.1) <sup>f</sup>                | 0 <sup>f</sup>                        |         |
| Missing                                                 | 7 (2.2)                              | 296 (100.0)                            |         | 2 (1.1) <sup>f</sup>                 | 49 (100.0) <sup>f</sup>               |         |

Abbreviations: ART, assisted reproductive technology; BMI, body mass index (calculated as weight in kilograms divided by height in meters squared); NA, not applicable.  
Women were included in preconception and pregnancy between 2017 and 2021. Values are presented as median (IQR), median (95% range) or number of participants (valid %).

<sup>a</sup> Study population of time to pregnancy and miscarriage consisting of 3,183 unique women and 2,330 unique men from Rotterdam, the Netherlands with a total of 3,476 and 2,513 study episodes.

<sup>b</sup> Non-responders consisted of 296 unique women and 49 unique men with a total of 296 and 49 study episodes.

<sup>c</sup> Included: African; American, non-western; Asian, non-western; Chinese; Indonesian ethnicity.

<sup>d</sup> Included: American, western; Asian, western; Cape Verdean; Dutch Antilles; European; German; Yugoslav; Moroccan; Oceanian; Polish; Surinamese, or Turkish.

<sup>e</sup> Time to pregnancy in months was derived from pregnancy episodes with a natural conception.

<sup>f</sup> Parity, miscarriage in previous pregnancy, time to pregnancy in months, occurrence of miscarriage, timing of miscarriage in weeks in men were derived from their partner.

**eTable 3.** Associations of Body Mass index in Women and Men With Fecundability

Ratios, Basic Model

|                                      | Women |                  | Men   |                  |
|--------------------------------------|-------|------------------|-------|------------------|
|                                      | N     | FR (95% CI)      | N     | FR (95% CI)      |
| Body mass index in kg/m <sup>2</sup> | 2,739 | 0.97 (0.96-0.97) | 2,074 | 0.98 (0.96-0.99) |
| Underweight (<18.5)                  | 83    | 0.81 (0.64-1.02) | 15    | 1.14 (0.68-1.89) |
| Normal weight (18.5-24.9)            | 1,699 | Reference        | 1,049 | Reference        |
| Overweight (25.0-29.9)               | 626   | 0.81 (0.74-0.89) | 796   | 0.88 (0.80-0.96) |
| Obesity (≥30.0)                      | 331   | 0.61 (0.54-0.69) | 214   | 0.76 (0.65-0.88) |

Values represent the fecundability per unit increase in and categories of body mass index (95% confidence interval (CI)), as compared to the reference category. Fecundability represents the probability of conceiving within one month. Models were analysed using Cox proportional hazards models . Fecundability ratios were derived from the Hazard Ratios of the Cox proportional hazards models.

**eTable 4.** Associations of Body Mass Index in Women and Men With Fecundability Ratios, Adjusted Model

|                                      | Women |                  | Men   |                  |
|--------------------------------------|-------|------------------|-------|------------------|
|                                      | N     | FR (95% CI)      | N     | FR (95% CI)      |
| Body mass index in kg/m <sup>2</sup> | 2,739 | 0.98 (0.97-0.99) | 2,074 | 0.99 (0.98-1.00) |
| Underweight (<18.5)                  | 83    | 0.84 (0.67-1.06) | 15    | 1.21 (0.72-2.03) |
| Normal weight (18.5-24.9)            | 1,699 | Reference        | 1,049 | Reference        |
| Overweight (25.0-29.9)               | 626   | 0.88 (0.80-0.98) | 796   | 0.94 (0.85-1.03) |
| Obesity (≥30.0)                      | 331   | 0.72 (0.63-0.82) | 214   | 0.87 (0.74-1.01) |

Values represent the fecundability per unit increase in and categories of body mass index (95% confidence interval (CI)), as compared to the reference category. Fecundability represents the probability of conceiving within one month. Models were analysed using Cox proportional hazards models. Fecundability ratios were derived from the Hazard Ratios of the Cox proportional hazards models. Models were adjusted for participants age, ethnicity, education level, smoking and alcohol consumption. Parity was included in the women's models.

**eTable 5.** Associations of Body Mass Index in Women and Men With Fecundability Ratios, Adjusted Model Excluding Top 5% of Time to Pregnancy

|                                      | Women |                  | Men   |                  |
|--------------------------------------|-------|------------------|-------|------------------|
|                                      | N     | FR (95% CI)      | N     | FR (95% CI)      |
| Body mass index in kg/m <sup>2</sup> | 2,602 | 0.98 (0.97-0.99) | 2,015 | 0.99 (0.98-1.00) |
| Underweight (<18.5)                  | 78    | 0.87 (0.68-1.10) | 15    | 1.06 (0.63-1.77) |
| Normal weight (18.5-24.9)            | 1,639 | Reference        | 1,028 | Reference        |
| Overweight (25.0-29.9)               | 591   | 0.87 (0.79-0.97) | 769   | 0.93 (0.84-1.03) |
| Obesity (≥30.0)                      | 294   | 0.80 (0.69-0.92) | 203   | 0.87 (0.74-1.02) |

Values represent the fecundability per unit increase in and categories of body mass index (95% confidence interval (CI)), as compared to the reference category. Fecundability represents the probability of conceiving within one month. Models were analysed using Cox proportional hazards models. Fecundability ratios were derived from the Hazard Ratios of the Cox proportional hazards models. Models were adjusted for participants age, ethnicity, education level, smoking and alcohol consumption. Parity was included in the women's models. The top 5% of time to pregnancy observations were excluded.

**eTable 6.** Associations of Body Mass Index in Women and Men With Fecundability Ratios, Adjusted Model Including Only First Episodes

|                                      | Women |                  | Men   |                  |
|--------------------------------------|-------|------------------|-------|------------------|
|                                      | N     | FR (95% CI)      | N     | FR (95% CI)      |
| Body mass index in kg/m <sup>2</sup> | 2,530 | 0.98 (0.97-0.99) | 1,893 | 0.99 (0.98-1.00) |
| Underweight (<18.5)                  | 80    | 0.82 (0.65-1.04) | 14    | 1.44 (0.85-2.46) |
| Normal weight (18.5-24.9)            | 1,576 | Reference        | 966   | Reference        |
| Overweight (25.0-29.9)               | 565   | 0.89 (0.80-0.99) | 719   | 0.95 (0.86-1.05) |
| Obesity (≥30.0)                      | 309   | 0.73 (0.63-0.84) | 194   | 0.86 (0.73-1.01) |

Values represent the fecundability per unit increase in and categories of body mass index (95% confidence interval (CI)), as compared to the reference category Fecundability represents the probability of conceiving within one month. Models were analysed using Cox proportional hazards models. Fecundability ratios were derived from the Hazard Ratios of the Cox proportional hazards models. Models were adjusted for participants age, ethnicity, education level, smoking and alcohol consumption. Parity was included in the women's model. Only the first episodes were included in the model.

**eTable 7.** Associations of Body Mass Index in Women and Men With Fecundability Ratios, Adjusted Model Including Body Mass Index of Partner

|                                      | Women |                  | Men   |                  |
|--------------------------------------|-------|------------------|-------|------------------|
|                                      | N     | FR (95% CI)      | N     | FR (95% CI)      |
| Body mass index in kg/m <sup>2</sup> | 2,074 | 1.00 (0.99-1.01) | 2,074 | 0.99 (0.98-1.00) |
| Underweight (<18.5)                  | 62    | 0.93 (0.72-1.20) | 15    | 1.22 (0.73-2.04) |
| Normal weight (18.5-24.9)            | 1,367 | Reference        | 1,049 | Reference        |
| Overweight (25.0-29.9)               | 436   | 0.99 (0.88-1.10) | 796   | 0.94 (0.86-1.03) |
| Obesity (≥30.0)                      | 209   | 0.93 (0.80-1.09) | 214   | 0.89 (0.76-1.04) |

Values represent the fecundability per unit increase in and categories of body mass index (95% confidence interval (CI)), as compared to the reference category. Fecundability represents the probability of conceiving within one month. Models were analysed using Cox proportional hazards models. Fecundability ratios were derived from the Hazard Ratios of the Cox proportional hazards models. Models were adjusted for body mass index of partner, participants age, ethnicity, education level, smoking and alcohol consumption. Parity was included in the women's model.



**eTable 8.** Associations of Joint Body Mass Index of Women and Men With Fecundability Ratios, Adjusted Model

|                                                                                                                                                                                                                                                                                                                                                                                                                                                                                                               | <b>Women and men combined</b> |                  |
|---------------------------------------------------------------------------------------------------------------------------------------------------------------------------------------------------------------------------------------------------------------------------------------------------------------------------------------------------------------------------------------------------------------------------------------------------------------------------------------------------------------|-------------------------------|------------------|
|                                                                                                                                                                                                                                                                                                                                                                                                                                                                                                               | Effect Estimate               | p-value          |
| Interaction term body mass index women * body mass index men                                                                                                                                                                                                                                                                                                                                                                                                                                                  | 1.00                          | 0.71             |
|                                                                                                                                                                                                                                                                                                                                                                                                                                                                                                               | N                             | FR (95% CI)      |
| Normal weight in both women and men (18.5-24.9 kg/m <sup>2</sup> )                                                                                                                                                                                                                                                                                                                                                                                                                                            | 791                           | Reference        |
| Normal weight in women (18.5-24.9 kg/m <sup>2</sup> ) * overweight and obesity in men (≥25.0 kg/m <sup>2</sup> )                                                                                                                                                                                                                                                                                                                                                                                              | 569                           | 0.89 (0.80-1.00) |
| Overweight and obesity in women (≥25.0 kg/m <sup>2</sup> ) * normal weight in men (18.5-24.9 kg/m <sup>2</sup> )                                                                                                                                                                                                                                                                                                                                                                                              | 222                           | 0.95 (0.82-1.11) |
| Overweight and obesity in both women and men (≥25.0 kg/m <sup>2</sup> )                                                                                                                                                                                                                                                                                                                                                                                                                                       | 415                           | 0.92 (0.80-1.04) |
| Values represent the fecundability per categories of body mass index (95% confidence interval (CI)), as compared to the reference category Fecundability represents the probability of conceiving within one month. Models were analysed using Cox proportional hazards models. Fecundability ratios were derived from the Hazard Ratios of the Cox proportional hazards models. Models were adjusted for age, ethnicity, education level, smoking and alcohol consumption of both women and men, and parity. |                               |                  |

**eTable 9.** Associations of Body Mass Index in Women and Men With Odds of Subfertility, Basic Model

|                                      | <b>Women</b> |                  | <b>Men</b> |                  |
|--------------------------------------|--------------|------------------|------------|------------------|
|                                      | N            | OR (95% CI)      | N          | OR (95% CI)      |
| Body mass index in kg/m <sup>2</sup> | 3,018        | 1.05 (1.04-1.07) | 2,294      | 1.05 (1.02-1.08) |
| Underweight (<18.5)                  | 97           | 1.87 (1.24-2.82) | 17         | 1.02 (0.33-3.17) |
| Normal weight (18.5-24.9)            | 1,846        | Reference        | 1,143      | Reference        |
| Overweight (25.0-29.9)               | 710          | 1.52 (1.27-1.82) | 884        | 1.25 (1.02-1.53) |
| Obesity (≥30.0)                      | 365          | 2.10 (1.67-2.63) | 250        | 1.97 (1.47-2.64) |

Values represent the odds of subfertility (time to pregnancy > 12 months) per unit increase in and categories of body mass index (95% confidence interval (CI)) from logistic regression models, as compared to the reference category.

**eTable 10.** Associations of Body Mass Index in Women and Men With Odds of Subfertility, Adjusted Model

|                                      | Women |                  | Men   |                  |
|--------------------------------------|-------|------------------|-------|------------------|
|                                      | N     | OR (95% CI)      | N     | OR (95% CI)      |
| Body mass index in kg/m <sup>2</sup> | 3,018 | 1.04 (1.02-1.05) | 2,294 | 1.03 (1.00-1.06) |
| Underweight (<18.5)                  | 97    | 1.88 (1.22-2.88) | 17    | 1.11 (0.35-3.48) |
| Normal weight (18.5-24.9)            | 1,846 | Reference        | 1,143 | Reference        |
| Overweight (25.0-29.9)               | 710   | 1.35 (1.11-1.63) | 884   | 1.13 (0.92-1.39) |
| Obesity (≥30.0)                      | 365   | 1.67 (1.30-2.13) | 250   | 1.69 (1.24-2.31) |

Values represent the odds of subfertility (time to pregnancy > 12 months) per unit increase in and categories of body mass index (95% confidence interval (CI)) from logistic regression models, as compared to the reference category. Models were adjusted for participants age, ethnicity, education level, smoking and alcohol consumption. Parity was included in the women's model.

**eTable 11.** Associations of Body Mass Index in Women and Men With Odds of Subfertility, Adjusted Model Excluding Couples Undergoing Assisted Reproductive Technology

|                                                                                                                                                                                                                                                                                                                                                                                                                                    | <b>Women</b> |                    | <b>Men</b> |                    |
|------------------------------------------------------------------------------------------------------------------------------------------------------------------------------------------------------------------------------------------------------------------------------------------------------------------------------------------------------------------------------------------------------------------------------------|--------------|--------------------|------------|--------------------|
|                                                                                                                                                                                                                                                                                                                                                                                                                                    | <b>N</b>     | <b>OR (95% CI)</b> | <b>N</b>   | <b>OR (95% CI)</b> |
| Body mass index in kg/m <sup>2</sup>                                                                                                                                                                                                                                                                                                                                                                                               | 2,703        | 1.04 (1.02-1.06)   | 2,074      | 1.02 (0.99-1.05)   |
| Underweight (<18.5)                                                                                                                                                                                                                                                                                                                                                                                                                | 82           | 1.71 (1.06-2.78)   | 15         | 0.75 (0.17- 3.41)  |
| Normal weight (18.5-24.9)                                                                                                                                                                                                                                                                                                                                                                                                          | 1,676        | Reference          | 1,049      | Reference          |
| Overweight (25.0-29.9)                                                                                                                                                                                                                                                                                                                                                                                                             | 620          | 1.25 (1.01-1.55)   | 796        | 1.08 (0.84-1.38)   |
| Obesity (≥30.0)                                                                                                                                                                                                                                                                                                                                                                                                                    | 325          | 1.69 (1.29-2.21)   | 214        | 1.45 (1.00-2.09)   |
| Values represent the odds of subfertility (time to pregnancy > 12 months) per unit increase in and categories of body mass index (95% confidence interval (CI)) from logistic regression models, as compared to the reference category. Models were adjusted for participants age, ethnicity, education level, smoking, alcohol consumption, and parity in the women's model, and stratified for assisted reproductive technology. |              |                    |            |                    |

**eTable 12.** Associations of Body Mass Index in Women and Men With Odds of Subfertility, Adjusted Model Excluding Top 5% of Time to Pregnancy

|                                      | Women |                   | Men   |                  |
|--------------------------------------|-------|-------------------|-------|------------------|
|                                      | N     | OR (95% CI)       | N     | OR (95% CI)      |
| Body mass index in kg/m <sup>2</sup> | 2,867 | 1.03 (1.01-1.05)  | 2,222 | 1.03 (1.00-1.06) |
| Underweight (<18.5)                  | 93    | 1.97 (1.28-3.04)  | 17    | 1.19 (0.38-3.71) |
| Normal weight (18.5-24.9)            | 1,773 | Reference         | 1,118 | Reference        |
| Overweight (25.0-29.9)               | 669   | 1.36 (1.12-1.65)  | 851   | 1.10 (0.88-1.37) |
| Obesity (≥30.0)                      | 332   | 1.64 (1.27- 2.12) | 236   | 1.62 (1.17-2.24) |

Values represent the odds of subfertility (time to pregnancy > 12 months) per unit increase in and categories of body mass index (95% confidence interval (CI)) from logistic regression models, as compared to the reference category. Models were adjusted for participants age, ethnicity, education level, smoking and alcohol consumption. Parity was included in the women's model. The top 5% of time to pregnancy observations were excluded.

**eTable 13.** Associations of Body Mass Index in Women and Men With Odds of Subfertility, Adjusted Model Including Only First Episodes

|                                      | Women |                  | Men   |                  |
|--------------------------------------|-------|------------------|-------|------------------|
|                                      | N     | OR (95% CI)      | N     | OR (95% CI)      |
| Body mass index in kg/m <sup>2</sup> | 2,775 | 1.04 (1.02-1.06) | 2,088 | 1.03 (1.01-1.06) |
| Underweight (<18.5)                  | 92    | 1.91 (1.23-2.97) | 16    | 0.94 (0.26-3.37) |
| Normal weight (18.5-24.9)            | 1,701 | Reference        | 1,048 | Reference        |
| Overweight (25.0-29.9)               | 645   | 1.37 (1.12-1.67) | 798   | 1.14 (0.91-1.43) |
| Obesity (≥30.0)                      | 337   | 1.68 (1.30-2.18) | 226   | 1.84 (1.32-2.57) |

Values represent the odds of subfertility (time to pregnancy > 12 months) per unit increase in and categories of body mass index (95% confidence interval (CI)) from logistic regression models, as compared to the reference category. Models were adjusted for participants age, ethnicity, education level, smoking and alcohol consumption. Parity was included in the women's model. Only the first episodes were included in the model.

**eTable 14.** Associations of Body Mass Index in Women and Men With Odds of Subfertility, Adjusted Model Including Body Mass Index of Partner

|                                      | Women |                  | Men   |                  |
|--------------------------------------|-------|------------------|-------|------------------|
|                                      | N     | OR (95% CI)      | N     | OR (95% CI)      |
| Body mass index in kg/m <sup>2</sup> | 2,294 | 1.02 (1.00-1.04) | 2,294 | 1.02 (1.00-1.05) |
| Underweight (<18.5)                  | 73    | 1.69 (1.00-2.86) | 17    | 1.10 (0.35-3.46) |
| Normal weight (18.5-24.9)            | 1,491 | Reference        | 1,143 | Reference        |
| Overweight (25.0-29.9)               | 498   | 1.22 (0.96-1.55) | 884   | 1.10 (0.89-1.37) |
| Obesity (≥30.0)                      | 232   | 1.32 (0.96-1.83) | 250   | 1.58 (1.15-2.18) |

Values represent the odds of subfertility (time to pregnancy > 12 months) per unit increase in and categories of body mass index (95% confidence interval (CI)) from logistic regression models, as compared to the reference category. Models were adjusted for body mass index of partner, participants age, ethnicity, education level, smoking and alcohol consumption. Parity was included in the women's model.

**eTable 15.** Associations of Joint Body Mass Index of Women and Men With Odds of Subfertility, Adjusted Model

| <b>Total population</b>                                                          |  |                                              |                                                   |
|----------------------------------------------------------------------------------|--|----------------------------------------------|---------------------------------------------------|
|                                                                                  |  | <b>Men</b>                                   |                                                   |
| <b>Women</b>                                                                     |  | Normal weight (18.5-24.9 kg/m <sup>2</sup> ) | Overweight and obesity (≥25.0 kg/m <sup>2</sup> ) |
| Normal weight (18.5-24.9 kg/m <sup>2</sup> )                                     |  | 920 (59)                                     | 704 (37)                                          |
| Overweight and obesity (≥25.0 kg/m <sup>2</sup> )                                |  | 288 (27)                                     | 552 (47)                                          |
| * NA = 1,572 of 4,036 episodes                                                   |  |                                              |                                                   |
| <b>Time to pregnancy population, stratified for subfertility (&gt;12 months)</b> |  |                                              |                                                   |
|                                                                                  |  | <b>Men</b>                                   |                                                   |
| <b>Women</b>                                                                     |  | Normal weight (18.5-24.9 kg/m <sup>2</sup> ) | Overweight and obesity (≥25.0 kg/m <sup>2</sup> ) |
| Normal weight (18.5-24.9 kg/m <sup>2</sup> )                                     |  | 851 (178)                                    | 632 (169)                                         |
| Overweight and obesity (≥25.0 kg/m <sup>2</sup> )                                |  | 249 (73)                                     | 473 (155)                                         |
| * NA = 813 of 3,018 episodes                                                     |  |                                              |                                                   |

  

|                                                                                                                  | <b>Women and men combined</b> |                  |
|------------------------------------------------------------------------------------------------------------------|-------------------------------|------------------|
|                                                                                                                  | Effect Estimate               | p-value          |
| Interaction term body mass index women * body mass index men                                                     | 1.00                          | 0.63             |
|                                                                                                                  | N                             | OR (95% CI)      |
| Normal weight in both women and men (18.5-24.9 kg/m <sup>2</sup> )                                               | 851                           | Reference        |
| Normal weight in women (18.5-24.9 kg/m <sup>2</sup> ) * overweight and obesity in men (≥25.0 kg/m <sup>2</sup> ) | 632                           | 1.27 (0.98-1.64) |
| Overweight and obesity in women (≥25.0 kg/m <sup>2</sup> ) * normal weight in men (18.5-24.9 kg/m <sup>2</sup> ) | 249                           | 1.35 (0.97-1.89) |
| Overweight and obesity in both women and men (≥25.0 kg/m <sup>2</sup> )                                          | 473                           | 1.41 (1.06-1.87) |

Values represent the odds of subfertility (95% confidence interval (CI)) from logistic regression models, as compared to the reference category. Models were adjusted for age, ethnicity, education level, smoking and alcohol consumption of both women and men, and parity and history of miscarriage.



**eTable 16.** Associations of Body Mass Index in Women and Men With Hazard Ratios of Miscarriage, Basic Model

|                                      | Women |                   | Men   |                  |
|--------------------------------------|-------|-------------------|-------|------------------|
|                                      | N     | HR (95% CI)       | N     | HR (95% CI)      |
| Body mass index in kg/m <sup>2</sup> | 2,763 | 1.01 (0.99-1.04)  | 2,186 | 1.01 (0.97-1.05) |
| Underweight (<18.5)                  | 71    | 0.97 (0.46- 2.08) | 16    | 0.00 (0.00-Inf)  |
| Normal weight (18.5-24.9)            | 1,686 | Reference         | 1,079 | Reference        |
| Overweight (25.0-29.9)               | 653   | 1.42 (1.10-1.83)  | 838   | 1.00 (0.72-1.38) |
| Obesity (≥30.0)                      | 353   | 1.26 (0.90-1.76)  | 253   | 0.99 (0.53-1.47) |

Values represent the Hazard Ratio of miscarriage per unit increase in and categories of body mass index (95% confidence interval (CI)) as compared to the reference category. Models were analysed using Cox proportional hazards models.

**eTable 17.** Associations of Body Mass Index in Women and Men With Hazard Ratios of Miscarriage, Adjusted Model

|                                      | Women |                  | Men   |                  |
|--------------------------------------|-------|------------------|-------|------------------|
|                                      | N     | HR (95% CI)      | N     | HR (95% CI)      |
| Body mass index in kg/m <sup>2</sup> | 2,763 | 1.02 (0.99-1.04) | 2,186 | 0.99 (0.95-1.04) |
| Underweight (<18.5)                  | 71    | 0.99 (0.46-2.13) | 16    | 0.00 (0.00-Inf)  |
| Normal weight (18.5-24.9)            | 1,686 | Reference        | 1,079 | Reference        |
| Overweight (25.0-29.9)               | 653   | 1.43 (1.10-1.86) | 838   | 0.93 (0.67-1.30) |
| Obesity (≥30.0)                      | 353   | 1.33 (0.94-1.88) | 253   | 0.79 (0.47-1.35) |

Values represent the Hazard Ratio of miscarriage per unit increase in and categories of body mass index (95% confidence interval (CI)) as compared to the reference category). Models were analysed using Cox proportional hazards models. Models were adjusted for participants age, ethnicity, education level, smoking and alcohol consumption. Parity and history of miscarriage were included in the women's model.

**eTable 18.** Associations of Body Mass Index in Women and Men With Hazard Ratios of Miscarriage, Adjusted Model Excluding Couples Undergoing Assisted Reproductive Technology

|                                                                                                                                                                                                                                                                                                                                                                                                                                                             | Women |                  | Men   |                  |
|-------------------------------------------------------------------------------------------------------------------------------------------------------------------------------------------------------------------------------------------------------------------------------------------------------------------------------------------------------------------------------------------------------------------------------------------------------------|-------|------------------|-------|------------------|
|                                                                                                                                                                                                                                                                                                                                                                                                                                                             | N     | HR (95% CI)      | N     | HR (95% CI)      |
| Body mass index in kg/m <sup>2</sup>                                                                                                                                                                                                                                                                                                                                                                                                                        | 2,499 | 1.02 (0.99-1.05) | 1,995 | 1.00 (0.96-1.04) |
| Underweight (<18.5)                                                                                                                                                                                                                                                                                                                                                                                                                                         | 60    | 1.15 (0.54-2.47) | 14    | 0.00 (0.00-Inf)  |
| Normal weight (18.5-24.9)                                                                                                                                                                                                                                                                                                                                                                                                                                   | 1,537 | Reference        | 996   | Reference        |
| Overweight (25-29.9)                                                                                                                                                                                                                                                                                                                                                                                                                                        | 581   | 1.39 (1.05-1.85) | 765   | 0.96 (0.68-1.35) |
| Obesity (≥30.0)                                                                                                                                                                                                                                                                                                                                                                                                                                             | 321   | 1.39 (0.97-2.00) | 220   | 0.82 (0.47-1.44) |
| Values represent the Hazard Ratio of miscarriage per unit increase in and categories of body mass index (95% confidence interval (CI)) as compared to the reference category. Models were analysed using Cox proportional hazards models. Models were adjusted for participants age, ethnicity, education level, smoking, alcohol consumption, parity and history of miscarriage in the women's model, and stratified for assisted reproductive technology. |       |                  |       |                  |

**eTable 19.** Associations of Body Mass Index in Women and Men With Hazard Ratios of Miscarriage, Adjusted Model Including Only First Episodes

|                                      | Women |                  | Men   |                  |
|--------------------------------------|-------|------------------|-------|------------------|
|                                      | N     | HR (95% CI)      | N     | HR (95% CI)      |
| Body mass index in kg/m <sup>2</sup> | 2,477 | 1.02 (0.99-1.04) | 1,963 | 1.00 (0.96-1.05) |
| Underweight (<18.5)                  | 65    | 1.07 (0.50-2.29) | 16    | 0.00 (0.00-Inf)  |
| Normal weight (18.5-24.9)            | 1,513 | Reference        | 979   | Reference        |
| Overweight (25.0-29.9)               | 578   | 1.43 (1.08-1.89) | 740   | 0.92 (0.65-1.32) |
| Obesity (≥30.0)                      | 321   | 1.30 (0.90-1.88) | 228   | 0.81 (0.46-1.42) |

Values represent the Hazard Ratio of miscarriage per unit increase in and categories of body mass index (95% confidence interval (CI)) as compared to the reference category. Models were analysed using Cox proportional hazards models. Models were adjusted for participants age, ethnicity, education level, smoking and alcohol consumption. Parity and history of miscarriage were included in the women's model. Only the first episodes were included in the model.

**eTable 20.** Associations of Body Mass Index in Women and Men With Hazard Ratios of Miscarriage, Adjusted Model Including Body Mass Index of Partner

|                                      | Women |                  | Men   |                  |
|--------------------------------------|-------|------------------|-------|------------------|
|                                      | N     | HR (95% CI)      | N     | HR (95% CI)      |
| Body mass index in kg/m <sup>2</sup> | 2,186 | 1.02 (0.99-1.06) | 2,186 | 0.99 (0.95-1.03) |
| Underweight (<18.5)                  | 59    | 0.98 (0.36-2.71) | 16    | 0.00 (000-Inf)   |
| Normal weight (18.5-24.9)            | 1,417 | Reference        | 1,079 | Reference        |
| Overweight (25.0-29.9)               | 471   | 1.68 (1.18-2.38) | 838   | 0.91 (0.66-1.27) |
| Obesity (≥30.0)                      | 239   | 1.33 (0.80-2.20) | 253   | 0.74 (0.43-1.28) |

Values represent the Hazard Ratio of miscarriage per unit increase in and categories of body mass index (95% confidence interval (CI)) as compared to the reference category. Models were analysed using Cox proportional hazards models. Models were adjusted for body mass index of partner, participants age, ethnicity, education level, smoking and alcohol consumption. Parity and history of miscarriage were included in the women's model.

**eTable 21.** Associations of Joint Body Mass Index of Women and Men With Hazard Ratios of Miscarriage, Adjusted Model

|                                                                                                                                                                                                                                                                                                                                                                             | <b>Women and men combined</b> |                  |
|-----------------------------------------------------------------------------------------------------------------------------------------------------------------------------------------------------------------------------------------------------------------------------------------------------------------------------------------------------------------------------|-------------------------------|------------------|
|                                                                                                                                                                                                                                                                                                                                                                             | Effect Estimate               | p-value          |
| Interaction term body mass index women * body mass index men                                                                                                                                                                                                                                                                                                                | 1.00                          | 0.57             |
|                                                                                                                                                                                                                                                                                                                                                                             | N                             | HR (95% CI)      |
| Normal weight in both women and men (18.5-24.9 kg/m <sup>2</sup> )                                                                                                                                                                                                                                                                                                          | 799                           | Reference        |
| Normal weight in women (18.5-24.9 kg/m <sup>2</sup> ) * overweight and obesity in men (≥25.0 kg/m <sup>2</sup> )                                                                                                                                                                                                                                                            | 608                           | 0.81 (0.53-1.23) |
| Overweight and obesity in women (≥25.0 kg/m <sup>2</sup> ) * normal weight in men (18.5-24.9 kg/m <sup>2</sup> )                                                                                                                                                                                                                                                            | 241                           | 1.37 (0.85-2.22) |
| Overweight and obesity in both women and men (≥25.0 kg/m <sup>2</sup> )                                                                                                                                                                                                                                                                                                     | 464                           | 1.33 (0.87-2.04) |
| Values represent the Hazard Ratio of miscarriage (95% confidence interval (CI)) from logistic regression models, as compared to the reference category. Models were analysed using Cox proportional hazards models. Models were adjusted for age, ethnicity, education level, smoking and alcohol consumption of both women and men, and parity and history of miscarriage. |                               |                  |

**eTable 22.** Associations of Body Mass Index in Women and Men With Odds of Miscarriage, Basic Model

|                                                                                                                                                                                                        | Women |                  | Men   |                  |
|--------------------------------------------------------------------------------------------------------------------------------------------------------------------------------------------------------|-------|------------------|-------|------------------|
|                                                                                                                                                                                                        | N     | OR (95% CI)      | N     | OR (95% CI)      |
| Body mass index in kg/m <sup>2</sup>                                                                                                                                                                   | 2,770 | 1.02 (1.00-1.05) | 2,189 | 1.00 (0.96-1.04) |
| Underweight (<18.5)                                                                                                                                                                                    | 71    | 0.99 (0.45-2.20) | 17    | 0.71 (0.09-5.39) |
| Normal weight (18.5-24.9)                                                                                                                                                                              | 1,688 | Reference        | 1,081 | Reference        |
| Overweight (25.0-29.9)                                                                                                                                                                                 | 655   | 1.48 (1.13-1.94) | 838   | 0.98 (0.70-1.37) |
| Obesity (≥30.0)                                                                                                                                                                                        | 356   | 1.38 (0.97-1.94) | 253   | 0.86 (0.51-1.46) |
| Values represent the odds of miscarriage per unit increase in and categories of body mass index (95% confidence interval (CI)) from logistic regression models, as compared to the reference category. |       |                  |       |                  |

**eTable 23.** Associations of Body Mass Index in Women and Men With Odds of Miscarriage, Adjusted Model

|                                      | Women |                  | Men   |                  |
|--------------------------------------|-------|------------------|-------|------------------|
|                                      | N     | OR (95% CI)      | N     | OR (95% CI)      |
| Body mass index in kg/m <sup>2</sup> | 2,770 | 1.02 (1.00-1.05) | 2,189 | 0.99 (0.95-1.03) |
| Underweight (<18.5)                  | 71    | 1.01 (0.45-2.27) | 17    | 0.75 (0.10-5.78) |
| Normal weight (18.5-24.9)            | 1,688 | Reference        | 1,081 | Reference        |
| Overweight (25.0-29.9)               | 655   | 1.49 (1.12-1.98) | 838   | 0.90 (0.64-1.27) |
| Obesity (≥30.0)                      | 356   | 1.44 (1.00-2.08) | 253   | 0.76 (0.44-1.32) |

Values represent the odds of miscarriage per unit increase in and categories of body mass index (95% confidence interval (CI)) from logistic regression models, as compared to the reference category). Models were adjusted for participants age, ethnicity, education level, smoking and alcohol consumption. Parity and history of miscarriage were included in the women's model.



**eTable 24.** Associations of Body Mass Index in Women and Men With Odds of Miscarriage, Adjusted Model Excluding Couples Undergoing Assisted Reproductive Technology

|                                                                                                                                                                                                                                                                                                                                                                                                                          | Women |                  | Men   |                  |
|--------------------------------------------------------------------------------------------------------------------------------------------------------------------------------------------------------------------------------------------------------------------------------------------------------------------------------------------------------------------------------------------------------------------------|-------|------------------|-------|------------------|
|                                                                                                                                                                                                                                                                                                                                                                                                                          | N     | OR (95% CI)      | N     | OR (95% CI)      |
| Body mass index in kg/m <sup>2</sup>                                                                                                                                                                                                                                                                                                                                                                                     | 2,506 | 1.02 (1.00-1.05) | 1,998 | 1.00 (0.95-1.04) |
| Underweight (<18.5)                                                                                                                                                                                                                                                                                                                                                                                                      | 60    | 1.21 (0.53-2.38) | 15    | 0.82 (0.10-6.39) |
| Normal weight (18.5-24.9)                                                                                                                                                                                                                                                                                                                                                                                                | 1,539 | Reference        | 998   | Reference        |
| Overweight (25.0-29.9)                                                                                                                                                                                                                                                                                                                                                                                                   | 583   | 1.45 (1.08-1.96) | 765   | 0.93 (0.65-1.32) |
| Obesity (≥30.0)                                                                                                                                                                                                                                                                                                                                                                                                          | 324   | 1.52 (1.03-2.22) | 220   | 0.79 (0.44-1.42) |
| Values represent the odds of miscarriage per unit increase in and categories of body mass index (95% confidence interval (CI)) from logistic regression models, as compared to the reference category. Models were adjusted for participants age, ethnicity, education level, smoking, alcohol consumption, parity and history of miscarriage in the women's model, and stratified for assisted reproductive technology. |       |                  |       |                  |

**eTable 25.** Associations of Body Mass Index in Women and Men With Odds of Miscarriage, Adjusted Model Including Only First Episodes

|                                      | Women |                  | Men   |                  |
|--------------------------------------|-------|------------------|-------|------------------|
|                                      | N     | OR (95% CI)      | N     | OR (95% CI)      |
| Body mass index in kg/m <sup>2</sup> | 2,483 | 1.02 (0.99-1.05) | 1,965 | 1.00 (0.95-1.04) |
| Underweight (<18.5)                  | 65    | 1.10 (0.49-2.49) | 17    | 0.78 (0.10-6.05) |
| Normal weight (18.5-24.9)            | 1,515 | Reference        | 980   | Reference        |
| Overweight (25.0-29.9)               | 580   | 1.51 (1.12-2.03) | 740   | 0.91 (0.63-1.32) |
| Obesity (≥30.0)                      | 323   | 1.39 (0.94-2.05) | 228   | 0.79 (0.44-1.42) |

Values represent the odds of miscarriage per unit increase in and categories of body mass index (95% confidence interval (CI)) from logistic regression models, as compared to the reference category. Models were adjusted for participants age, ethnicity, education level, smoking and alcohol consumption. Parity and history of miscarriage were included in the women's model. Only the first episodes were included in the model.

**eTable 26.** Associations of Body Mass Index in Women and Men With Odds of Miscarriage, Adjusted Model Including Body Mass Index of Partner

|                                                                                                                                                                                                                                                                                                                                                                                                                  | Women |                  | Men   |                  |
|------------------------------------------------------------------------------------------------------------------------------------------------------------------------------------------------------------------------------------------------------------------------------------------------------------------------------------------------------------------------------------------------------------------|-------|------------------|-------|------------------|
|                                                                                                                                                                                                                                                                                                                                                                                                                  | N     | OR (95% CI)      | N     | OR (95% CI)      |
| Body mass index in kg/m <sup>2</sup>                                                                                                                                                                                                                                                                                                                                                                             | 2,189 | 1.03 (0.99-1.07) | 2,189 | 0.98 (0.94-1.03) |
| Underweight (<18.5)                                                                                                                                                                                                                                                                                                                                                                                              | 59    | 1.02 (0.36-2.89) | 17    | 0.74 (0.10-5.76) |
| Normal weight (18.5-24.9)                                                                                                                                                                                                                                                                                                                                                                                        | 1,418 | Reference        | 1,081 | Reference        |
| Overweight (25.0-29.9)                                                                                                                                                                                                                                                                                                                                                                                           | 472   | 1.77 (1.23-2.54) | 838   | 0.88 (0.62-1.24) |
| Obesity (≥30.0)                                                                                                                                                                                                                                                                                                                                                                                                  | 240   | 1.43 (0.85-2.41) | 253   | 0.70 (0.40-1.23) |
| Values represent the odds of miscarriage per unit increase in and categories of body mass index (95% confidence interval (CI)) from logistic regression models, as compared to the reference category. Models were adjusted for body mass index of partner, participants age, ethnicity, education level, smoking and alcohol consumption. Parity and history of miscarriage were included in the women's model. |       |                  |       |                  |

**eTable 27.** Associations of Joint Body Mass Index of Women and Men With Odds of Miscarriage, Adjusted Model

| <b>Total population</b>                                   |  |                                              |                                                   |
|-----------------------------------------------------------|--|----------------------------------------------|---------------------------------------------------|
|                                                           |  | <b>Men</b>                                   |                                                   |
| <b>Women</b>                                              |  | Normal weight (18.5-24.9 kg/m <sup>2</sup> ) | Overweight and obesity (≥25.0 kg/m <sup>2</sup> ) |
| Normal weight (18.5-24.9 kg/m <sup>2</sup> )              |  | 920 (59)                                     | 704 (37)                                          |
| Overweight and obesity (≥25.0 kg/m <sup>2</sup> )         |  | 288 (27)                                     | 552 (47)                                          |
| * NA = 1,572 of 4,036 episodes                            |  |                                              |                                                   |
| <b>Miscarriage population, stratified for miscarriage</b> |  |                                              |                                                   |
|                                                           |  | <b>Men</b>                                   |                                                   |
| <b>Women</b>                                              |  | Normal weight (18.5-24.9 kg/m <sup>2</sup> ) | Overweight and obesity (≥25.0 kg/m <sup>2</sup> ) |
| Normal weight (18.5-24.9 kg/m <sup>2</sup> )              |  | 800 (59)                                     | 608 (37)                                          |
| Overweight and obesity (≥25.0 kg/m <sup>2</sup> )         |  | 242 (27)                                     | 464 (47)                                          |
| * NA = 656 of 2,770 episodes                              |  |                                              |                                                   |

  

|                                                                                                                  | <b>Women and men combined</b> |                  |
|------------------------------------------------------------------------------------------------------------------|-------------------------------|------------------|
|                                                                                                                  | Effect Estimate               | p-value          |
| Interaction term body mass index women * body mass index men                                                     | 1.00                          | 0.69             |
|                                                                                                                  | N                             | OR (95% CI)      |
| Normal weight in both women and men (18.5-24.9 kg/m <sup>2</sup> )                                               | 800                           | Reference        |
| Normal weight in women (18.5-24.9 kg/m <sup>2</sup> ) * overweight and obesity in men (≥25.0 kg/m <sup>2</sup> ) | 608                           | 0.79 (0.51-1.23) |
| Overweight and obesity in women (≥25.0 kg/m <sup>2</sup> ) * normal weight in men (18.5-24.9 kg/m <sup>2</sup> ) | 242                           | 1.49 (0.90-2.45) |
| Overweight and obesity in both women and men (≥25.0 kg/m <sup>2</sup> )                                          | 464                           | 1.33 (0.85-2.07) |

Values represent the odds of miscarriage (95% confidence interval (CI)) from logistic regression models, as compared to the reference category. Models were adjusted for age, ethnicity, education level, smoking and alcohol consumption of both women and men, and parity and history of miscarriage.
