# Supplementary material for: Preconception and Early-Pregnancy Body Mass Index in Women and Men, Time to Pregnancy, and Risk of Miscarriage
Source: PubMed Central journal article supplement (PMC11413718; doi:10.1001/jamanetworkopen.2024.36157), 2024-09-19
Supplement: jamanetwopen-e2436157-s002.pdf [file jamanetwopen-e2436157-s002.pdf]

## Data Sharing Statement

Boxem. Preconception and Early-Pregnancy Body Mass Index in Women and Men, Time to Pregnancy, and Risk of Miscarriage. *JAMA Netw Open*. Published September 19, 2024. doi:10.1001/jamanetworkopen.2024.36157

### Data

**Data available:** No

### Additional Information

**Explanation for why data not available:** Data are available upon request to the corresponding author. Unrestricted data sharing is not allowed due to ethical consent and privacy restrictions.
